# Supplementary material for: Rise of multiple insecticide resistance in Anopheles funestus in Malawi: a major concern for malaria vector control
Source: PubMed Central journal article supplement (PMC4570681; doi:10.1186/s12936-015-0877-y), 2015-09-15
Supplement: 12936_2015_877_MOESM1_ESM.pdf [file 12936_2015_877_MOESM1_ESM.pdf]

**Table S1:** List of primers used for Taqman A296S assay and VGSC sequencing

| <b>Primers</b>          | <b>Sequence</b>             | <b>Modification /<br/>Expected size (bp)</b> |
|-------------------------|-----------------------------|----------------------------------------------|
| Forward                 | CATATCGTGGGTATCATTTTGGCTAAA |                                              |
| Reverse                 | CGACATCAGTGTGTCATTGTCAAG    |                                              |
| Reporter A296           | AGGAGCGTATTCTTTTCTA         | VIC                                          |
| Reporter 296S           | AGGAGCGTATTTTTTTCTA         | FAM                                          |
| VGSC-funestus Forward   | GTTCAATGAAGCCCCTCAA         |                                              |
| VGSC-funestus Reverse   | CCGAAATTTGACAAAAGCAA        | 994                                          |
| VGSC-arabiensis Forward | AAATGTCTCGCCCAAATCAG        |                                              |
| VGSC-arabiensis Reverse | GCACCTGCAAAACAATGTCA        | 550                                          |
