# Supplementary material for: Rise of multiple insecticide resistance in Anopheles funestus in Malawi: a major concern for malaria vector control
Source: PubMed Central journal article supplement (PMC4570681; doi:10.1186/s12936-015-0877-y), 2015-09-15
Supplement: 12936_2015_877_MOESM3_ESM.pdf [file 12936_2015_877_MOESM3_ESM.pdf]

**Table S2:** Summary statistics for polymorphism at the sodium channel gene in susceptible and resistant permethrin and DDT *An. funestus* in Chikwawa, Malawi.

| Samples                 | N  | S  | $\pi$ (k)    | h(hd)    | Syn | Nonsyn | D                  | D*                 |
|-------------------------|----|----|--------------|----------|-----|--------|--------------------|--------------------|
| <b>Permethrin</b>       |    |    |              |          |     |        |                    |                    |
| <b>Resistant</b>        | 16 | 9  | 0.0039(3.65) | 5(0.7)   | 0   | 0      | 1.27 <sup>ns</sup> | 0.43 <sup>ns</sup> |
| <b>Susceptible</b>      | 16 | 14 | 0.0046(4.3)  | 5(0.61)  | 0   | 0      | 0.06 <sup>ns</sup> | 1.16 <sup>ns</sup> |
| <b>Total Permethrin</b> | 32 | 17 | 0.0042(3.85) | 8(0.68)  | 0   | 0      | -                  | 0.49 <sup>ns</sup> |
|                         |    |    |              |          |     |        | 0.078              |                    |
|                         |    |    |              |          |     |        | ns                 |                    |
| <b>DDT</b>              |    |    |              |          |     |        |                    |                    |
| <b>Resistant</b>        | 20 | 14 | 0.0053(4.96) | 10(0.86) | 0   | 0      | 0.94 <sup>ns</sup> | 1.5 <sup>*</sup>   |
| <b>Susceptible</b>      | 20 | 10 | 0.0038(3.54) | 6(0.69)  | 0   | 0      | 0.89 <sup>ns</sup> | 1.41 <sup>*</sup>  |
| <b>Total DDT</b>        | 40 | 15 | 0.0046(4.3)  | 13(0.79) | 0   | 0      | 0.7 <sup>ns</sup>  | 1.5 <sup>*</sup>   |
| <b>Overall Total</b>    | 72 | 21 | 0.0045(4.2)  | 18(0.75) | 0   | 0      | -                  | 0.95 <sup>ns</sup> |
|                         |    |    |              |          |     |        | 0.05 <sup>ns</sup> |                    |

N, number of sequences (2n); S, number of polymorphic sites; h, Number of haplotypes (haplotype diversity);  $\pi$ , nucleotide diversity (k= mean number of nucleotide differences); D and D\*, Tajima's and Fu and Li's statistics; ns, not significant; \*, P<0.05
